# Supplementary material for: Camel milk exosomes alleviate hyperglycemia by regulating the hepatic mitochondrial complex I activity, hepatic metabolome, and gut microbiota in high-fat diet (HFD) and streptozotocin (STZ)-induced diabetic mice
Source: Royal Society of Chemistry journal article supplement (doi:10.1039/d5fo02492g), 2025-11-26
Supplement: d5fo02492g4.pdf [file d5fo02492g4.pdf]

Table S1. Analysis of BW measurements in each group.

| Week | BW (g)                  |                          |                          |                         |                           |
|------|-------------------------|--------------------------|--------------------------|-------------------------|---------------------------|
|      | NC                      | DC                       | Met                      | ig-exo                  | ip-exo                    |
| 0    | 23.01±0.34 <sup>a</sup> | 23.28±0.40 <sup>a</sup>  | 22.69±0.50 <sup>a</sup>  | 22.18±0.37 <sup>a</sup> | 22.50±0.42 <sup>a</sup>   |
| 1    | 24.70±0.53 <sup>a</sup> | 23.69±0.47 <sup>ab</sup> | 22.70±0.47 <sup>b</sup>  | 22.63±0.48 <sup>b</sup> | 23.28±0.50 <sup>ab</sup>  |
| 2    | 25.26±0.36 <sup>a</sup> | 24.94±0.41 <sup>a</sup>  | 23.40±0.35 <sup>b</sup>  | 23.39±0.40 <sup>b</sup> | 24.26±0.35 <sup>ab</sup>  |
| 3    | 26.06±0.36 <sup>a</sup> | 25.35±0.50 <sup>a</sup>  | 23.39±0.44 <sup>b</sup>  | 23.45±0.60 <sup>b</sup> | 24.80±0.39 <sup>ab</sup>  |
| 4    | 26.78±0.15 <sup>a</sup> | 25.36±0.43 <sup>ab</sup> | 24.73±0.49 <sup>bc</sup> | 23.44±0.55 <sup>c</sup> | 24.96±0.49 <sup>bc</sup>  |
| 5    | 26.59±0.33 <sup>a</sup> | 25.90±0.50 <sup>ab</sup> | 24.74±0.36 <sup>bc</sup> | 23.99±0.56 <sup>c</sup> | 25.39±0.48 <sup>abc</sup> |

<sup>a-c</sup>Values not sharing a common superscript within the same row differ significantly at  $p < 0.05$ .

All values are presented as mean ± SEM (n = 8). Data were analyzed via one-way ANOVA.

Table S2. FBG levels in each group of mice.

| Week | FBG levels (mmol/L)    |                         |                          |                          |                          |
|------|------------------------|-------------------------|--------------------------|--------------------------|--------------------------|
|      | NC                     | DC                      | Met                      | ig-exo                   | ip-exo                   |
| 0    | 6.14±0.56 <sup>b</sup> | 16.71±0.76 <sup>a</sup> | 16.53±0.38 <sup>a</sup>  | 16.80±0.30 <sup>a</sup>  | 16.81±0.87 <sup>a</sup>  |
| 1    | 5.30±0.13 <sup>b</sup> | 14.59±0.40 <sup>a</sup> | 14.41±0.65 <sup>a</sup>  | 14.23±0.91 <sup>a</sup>  | 14.24±0.79 <sup>a</sup>  |
| 2    | 4.75±0.15 <sup>b</sup> | 14.61±0.57 <sup>a</sup> | 13.20±0.62 <sup>a</sup>  | 13.44±0.78 <sup>a</sup>  | 13.13±0.58 <sup>a</sup>  |
| 3    | 4.98±0.18 <sup>c</sup> | 13.53±0.40 <sup>a</sup> | 10.66±0.74 <sup>b</sup>  | 11.54±0.51 <sup>ab</sup> | 12.01±0.47 <sup>ab</sup> |
| 4    | 5.96±0.27 <sup>c</sup> | 14.10±0.45 <sup>a</sup> | 12.06±0.66 <sup>ab</sup> | 11.15±0.82 <sup>b</sup>  | 11.31±0.14 <sup>b</sup>  |
| 5    | 6.06±0.31 <sup>c</sup> | 12.39±0.49 <sup>a</sup> | 9.88±0.51 <sup>b</sup>   | 9.91±0.33 <sup>b</sup>   | 10.86±0.39 <sup>ab</sup> |

<sup>a-c</sup>Values not sharing a common superscript within the same row differ significantly at  $p < 0.05$ .

All values are presented as mean ± SEM (n = 8). Data were analyzed via one-way ANOVA.

Table S3. Blood glucose during OGTT by group and time.

| Time (min) | OGTT (mmol/L)           |                         |                          |                         |                          |
|------------|-------------------------|-------------------------|--------------------------|-------------------------|--------------------------|
|            | NC                      | DC                      | Met                      | ig-exo                  | ip-exo                   |
| 0          | 6.60±0.20 <sup>b</sup>  | 11.30±0.82 <sup>a</sup> | 9.84±0.72 <sup>a</sup>   | 9.20±0.69 <sup>ab</sup> | 11.89±0.89 <sup>a</sup>  |
| 60         | 10.15±0.45 <sup>c</sup> | 31.03±0.54 <sup>a</sup> | 27.28±0.63 <sup>b</sup>  | 27.10±0.49 <sup>b</sup> | 28.86±1.20 <sup>ab</sup> |
| 90         | 9.91±0.26 <sup>c</sup>  | 26.48±0.67 <sup>a</sup> | 25.18±0.36 <sup>ab</sup> | 23.95±0.57 <sup>b</sup> | 25.33±0.94 <sup>ab</sup> |
| 120        | 8.93±0.21 <sup>c</sup>  | 24.24±0.62 <sup>a</sup> | 22.71±0.48 <sup>ab</sup> | 21.99±0.4 <sup>b</sup>  | 22.93±0.66 <sup>ab</sup> |

<sup>a-c</sup>Values not sharing a common superscript within the same row differ significantly at  $p < 0.05$ .

All values are presented as mean ± SEM (n = 8). Data were analyzed via one-way ANOVA.

Table S4. Blood glucose by group and time in the PTT assay.

| Time (min) | PTT (mmol/L)            |                         |                         |                         |                          |
|------------|-------------------------|-------------------------|-------------------------|-------------------------|--------------------------|
|            | NC                      | DC                      | Met                     | ig-exo                  | ip-exo                   |
| 0          | 8.09±0.35 <sup>b</sup>  | 13.85±0.86 <sup>a</sup> | 10.5±0.58 <sup>b</sup>  | 10.39±1.01 <sup>b</sup> | 13.56±0.58 <sup>a</sup>  |
| 30         | 13.53±0.47 <sup>c</sup> | 22.11±0.76 <sup>a</sup> | 17.70±0.78 <sup>b</sup> | 17.68±0.75 <sup>b</sup> | 20.30±0.91 <sup>ab</sup> |
| 60         | 14.41±0.68 <sup>b</sup> | 22.15±0.80 <sup>a</sup> | 20.25±1.27 <sup>a</sup> | 20.15±0.56 <sup>a</sup> | 21.63±0.68 <sup>a</sup>  |
| 90         | 12.25±0.80 <sup>b</sup> | 20.78±0.79 <sup>a</sup> | 18.41±1.13 <sup>a</sup> | 18.55±0.73 <sup>a</sup> | 19.93±0.65 <sup>a</sup>  |
| 120        | 10.18±0.62 <sup>b</sup> | 18.53±0.59 <sup>a</sup> | 16.53±1.10 <sup>a</sup> | 17.05±0.34 <sup>a</sup> | 17.36±0.42 <sup>a</sup>  |

<sup>a-c</sup>Values not sharing a common superscript within the same row differ significantly at  $p < 0.05$ .

All values are presented as mean ± SEM (n = 8). Data were analyzed via one-way ANOVA.
