# Supplementary material for: Camel milk exosomes alleviate hyperglycemia by regulating the hepatic mitochondrial complex I activity, hepatic metabolome, and gut microbiota in high-fat diet (HFD) and streptozotocin (STZ)-induced diabetic mice
Source: Royal Society of Chemistry journal article supplement (doi:10.1039/d5fo02492g), 2025-11-26
Supplement: d5fo02492g5.xlsx [file d5fo02492g5.xlsx]

## Sheet: Table S5 
	DC.vs.NC					ig_exo.vs.DC
Name	DC.vs.NC_FC	DC.vs.NC_log2FC	DC.vs.NC_Pvalue	DC.vs.NC_VIP	DC.vs.NC_Up.Down	ig_exo.vs.DC_FC	ig_exo.vs.DC_log2FC	ig_exo.vs.DC_Pvalue	ig_exo.vs.DC_VIP	ig_exo.vs.DC_Up.Down
3-dehydrocholic acid	0.162435197842826	-2.62206	0.0013739389975428	1.94642752590321	down	2.02418963609536	1.0173444551698	0.0433110917285176	1.32849724788866	up
11beta-Hydroxyprogesterone	0.513775990324903	-0.960789	0.0431088146144096	1.25483614602113	down	2.02254040032418	1.0161685208333564	0.0127324866562864	2.08946250743845	up
Linoleoylcarnitine	0.315367743440483	-1.66489	0.0001083730205403	2.18142534364607	down	1.80838789897129	0.8547041688475442	0.0006857233350684	1.73272603233745	up
Kuguacin Q	0.066938319908301	-3.90102	2.59971236502406e-06	1.34809869176972	down	0.142056363258554	-2.81546	0.000218064904119	1.54023663640477	down
9(Z),11(E),13(E)-Octadecatrienoic Acid methyl ester	0.417355916878574	-1.26065	0.0008187639097826	1.19567261588881	down	3.63191861801598	1.8607318758941984	0.0478126645005491	2.14425771973588	up
3-Oxo-4,6-choladien-24-oic acid	0.126920284749143	-2.97801	0.0112198715618294	1.68590555128322	down	2.67917942304915	1.4217912008426397	0.0169549850752425	1.58968291341402	up
Arg Val Phe	4.25789477261731	2.09014029622068	0.0002592119194962	1.33477701629832	up	3.06193619679852	1.6144442209430587	0.001072242365532	1.35411351664574	up
Cuminaldehyde	0.550705897659321	-0.860646	0.0425338671016782	1.36790763138308	down	1.56795233490304	0.6488817027922609	0.0162225225461096	1.73531128877511	up
Inositol	1.34510735165352	0.4277213174047721	0.0037918464823185	1.55986952045891	up	0.786894984019953	-0.345757	0.0260524480608563	1.91478504857865	down
Nostocyclyne A	0.376558424728183	-1.40905	0.0312386327136659	1.39825297118088	down	2.32097391895747	1.214730311048562	0.0304465419868708	1.95940923056025	up
beta-D-Glucopyranosyl abscisate	3.05124321778303	1.609397183228334	0.0029477085195297	1.33150191532047	up	1.77496696844274	0.8277921767822403	0.0279581419150578	1.19429691085095	up
1,1,5-trimethyl-1,2-dihydronaphthalene	0.537915223364072	-0.894549	0.0217641227932786	1.17047538079372	down	2.40372084763972	1.2652693606455077	0.0074938295614122	2.32982542189596	up
2'-Hydroxy-5'-methylacetophenone	2.49889966697868	1.3212929771116213	0.0052163137912788	1.30217021095353	up	1.61677338546508	0.6931174780836405	0.0463847595630382	1.2008001972474	up
11,12,13-Trinor-6,9-eremophiladien-8-one	0.677175433768284	-0.562398	0.0245101887763297	1.41929622049238	down	1.37006596695649	0.4542453588133868	0.0191393311431139	1.70480771083816	up
3-Oxo-7-hydroxychol-4-enoic acid	0.207030860030371	-2.27208	0.0089288265179994	1.66180571304658	down	2.43520635109214	1.2840440265514952	0.0270980414233109	1.6419242922059	up
Hippolide G	0.131579093240974	-2.926	0.014759843177134	1.60796793510459	down	2.84587938379828	1.508874517773186	0.0361092557744792	1.6686920387993	up
Vielanin A	0.223403290833973	-2.16228	0.0025427647621319	1.10258554577278	down	0.24767990291992	-2.01345	0.0115350745927384	1.61691373918416	down
Chabrolobenzoquinone G	0.365334516088769	-1.45271	0.0178376094257827	1.60985383512023	down	1.6352124408973	0.709478077631177	0.0260496174948907	1.42106722277982	up
3,6-Dihydrochamazulene	0.464274728694893	-1.10695	0.0093910217938035	1.71936661637034	down	1.43411363006824	0.520159338573463	0.0334902890203808	1.36310707224759	up
Phenethyl ferulate	0.0421414398297334	-4.56862	0.0002707442712274	2.0350453555894	down	4.21245144141103	2.074660055875677	0.0193191468065513	1.58369840873577	up
Bis(ethylphenyl)ether	2.53777456622798	1.3435639184186126	0.0479775530230098	1.04936518559082	up	1.80871351689017	0.8549639168081634	0.0449325471896294	1.27294852547983	up
Prostaglandin H2 2-glyceryl Ester	2.18166523662649	1.1254297457904383	0.0430598080190422	1.05424	up	2.0143997962683	1.0103500422587608	0.0170934112110932	1.28816822378085	up
Tritoniopsin C	0.180875215515327	-2.46693	0.0087211556634347	1.62715463531476	down	3.15957335053292	1.659729758836918	0.0248730577489389	1.79005452236718	up
cis-Hexadec-11-en-7,9-diynoic acid	0.489785027169006	-1.02978	0.0234816991035857	1.44921285801414	down	1.87569170342708	0.9074227199174376	0.0312247756834042	1.98148546958355	up
Artemether	0.247867683581594	-2.01236	0.0215738780661005	1.45921567099014	down	2.89118072675291	1.531658794024518	0.0150401641792552	1.92878396768979	up
Methyl heptadecanoate	10.0538566805344	3.3296771233125697	0.0080053184500566	1.2780679388512	up	2.21212095911084	1.145430274513956	0.0475793085440407	1.22756497036383	up
Hythiemoside B	3.31807867345119	1.7303480937839135	0.0259712193151511	1.12900888616082	up	2.35346188999045	1.2347844914096002	0.0266302381363992	1.18531705929056	up

## Sheet: Table S6 
	DC.vs.NC					ig_exo.vs.DC
Name	DC.vs.NC_FC	DC.vs.NC_log2FC	DC.vs.NC_Pvalue	DC.vs.NC_VIP	DC.vs.NC_Up.Down	ig_exo.vs.DC_FC	ig_exo.vs.DC_log2FC	ig_exo.vs.DC_Pvalue	ig_exo.vs.DC_VIP	ig_exo.vs.DC_Up.Down
(3'x,5'a,9'x,10'b)-O-(6-Oxo-7-drimen-11-yl)umbelliferone	2.30243429072112	1.2031599837635178	0.0206440475374978	1.53317091146233	up	0.494392804031538	-1.01627	0.0332064627206096	1.09568875717103	down
LysoPE(20:1(11Z)/0:0)	0.417768927999475	-1.25922	0.0295110583691957	1.12898987285388	down	0.407357021461176	-1.29563	0.0328749309985447	1.0103	down
23-Norcholic acid	0.136823507530603	-2.86961	8.06298680385486e-05	1.39667311152686	down	0.263888705737172	-1.922	0.0091235073509366	1.22897352761419	down
Antcin K	0.037734873330079	-4.72796	0.0006517417178816	2.34613149127574	down	2.34609910282632	1.2302639563060134	0.0387722284557576	1.47462525138429	up
Muricatacin	0.143725503379898	-2.79861	5.17050368073836e-05	1.51302642475724	down	0.312121854959893	-1.67982	0.0016832851103515	1.04229523944589	down
Camphoratin B	0.0243037982864744	-5.36267	6.14116360389161e-08	2.43030192987464	down	3.97444812661515	1.9907545483793236	0.0181982168245986	1.0630106088621	up
Galactose 1-phosphate	2.09323549810253	1.0657346301947477	0.0063189879667623	1.71131446457478	up	0.565415005802665	-0.822618	0.0298382611995859	1.15029134300822	down
Pandangolide 2	0.439386019308195	-1.18644	0.0077910499528164	1.73843941244442	down	1.68614680654314	0.7537301518501602	0.0270499512873081	1.63028690471874	up
LPE(20:0/0:0)	0.330298130860099	-1.59816	0.0079970217859876	1.18405682144499	down	0.295702072474072	-1.75778	0.0039228453805906	1.43315485769444	down
Acetyl-maltose	6.56161068912971	2.714049998988365	0.0043674926244977	1.60749467384304	up	0.137528361477381	-2.8622	0.0025290451223039	2.2750685199208	down
3-methoxy Prostaglandin F1alpha	0.213022413054985	-2.23092	0.005926406551035	1.82636708352839	down	2.21198693205837	1.1453428624667097	0.0349793574078743	1.68103055753407	up
2-Methyleneglutarate	4.63614967594603	2.2129271438377693	0.0014195128126794	2.13431263622788	up	0.425882442911031	-1.23147	0.031736304886194	1.10042666811644	down
L-L-Homoglutathione	1.78431554664499	0.835370770709092	0.0310451230942201	1.51153083914779	up	0.521237504454952	-0.939987	0.0123403667322409	1.54473423024388	down
Podocarpaside E	0.0155129180808982	-6.01039	9.0919912542272e-06	2.41352995236585	down	4.92399542745159	2.2998294220993856	0.0007613392977795	1.96048496678498	up
2-Ketobutyric acid	2.14600499905836	1.1016534368159192	0.0202808324308876	1.58102407517791	up	0.462134006583821	-1.11362	0.0174073846941607	1.40903512151029	down
2-Keto-D-Gluconic acid	1.98860427269519	0.9917562120079356	0.0218555468133671	1.62541900574155	up	0.534566660832573	-0.903558	0.0275691424584819	1.08127131364542	down
Wilforic acid B	0.0037919628421488	-8.04284	1.20831676143328e-06	2.47716868017687	down	23.9546389249533	4.582233162371222	0.0001336029445999	1.59247828255746	up
Palmitoleic acid	0.383816497630009	-1.38151	0.0032082878060412	1.23594204912558	down	0.381301506209933	-1.391	0.007535327806827	1.01734281477387	down
Gulonolactone	2.1530709369883	1.1063958526009747	0.0093925839900914	1.80709828666481	up	0.550947908709632	-0.860012	0.0283166273026562	1.03056566850841	down
