# Supplementary figures and images for: Camel milk exosomes alleviate hyperglycemia by regulating the hepatic mitochondrial complex I activity, hepatic metabolome, and gut microbiota in high-fat diet (HFD) and streptozotocin (STZ)-induced diabetic mice
Source: Royal Society of Chemistry journal article supplement (doi:10.1039/d5fo02492g), 2025-11-26

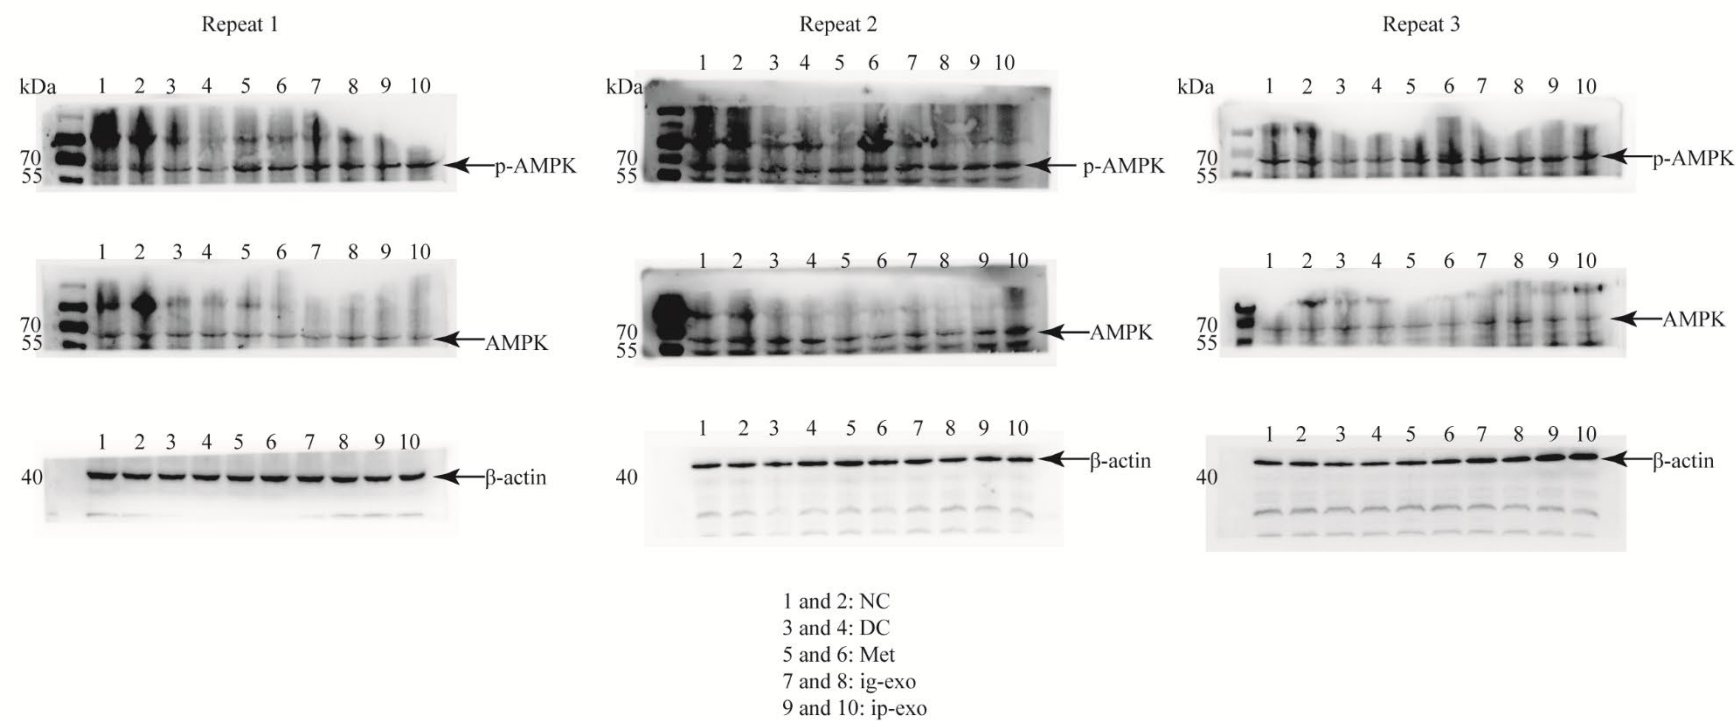

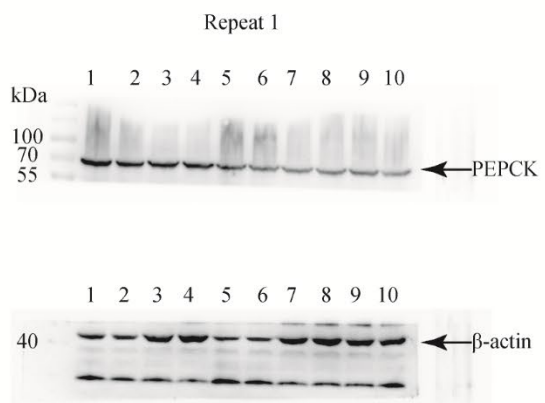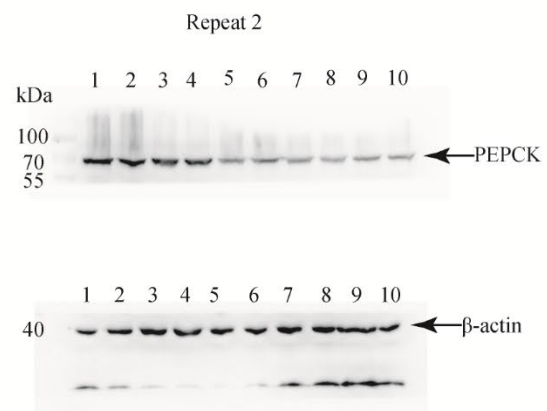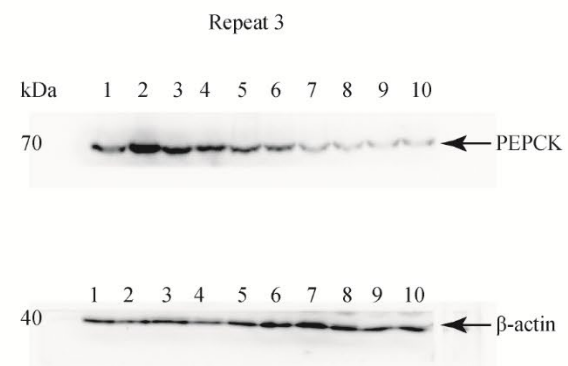

1 and 2: NC  
3 and 4: DC  
5 and 6: Met  
7 and 8: ig-exo  
9 and 10: ip-exo

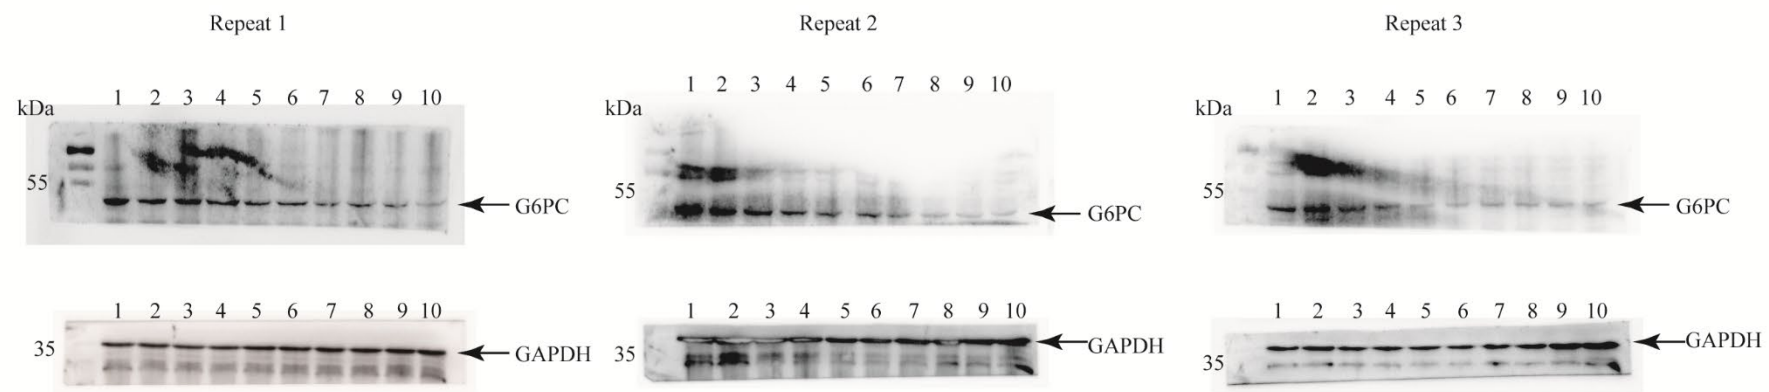

1 and 2: NC  
 3 and 4: DC  
 5 and 6: Met  
 7 and 8: ig-exo  
 9 and 10: ip-exo

Supplement: d5fo02492g6.pdf [file d5fo02492g6.pdf]
